# Supplementary material for: The influence of physical activity levels on lactate production during squat training using a functional electromechanical dynamometer
Source: PeerJ. 2025 Jan 24;13:e18215. doi: 10.7717/peerj.18215 (PMC11771300; doi:10.7717/peerj.18215)
Supplement: Supplemental Information 1 [file peerj-13-18215-s001.xlsx]

## Sheet: 50% S1
code	descriptive					IPAQ						Lactate (mg/dl)
participant	age	gender	heigth	weight	BMI	low (days)	low (minutes)	moderate (days)	moderate (minutes)	vigorous (days)	vigorous (minutes)	PRE	INM POST	POST
101	34	male	1.91	91	24.94	0	0	7	20	5	90	2.6	15.9	11.9
102	25	female	1.74	83.5	27.58	4	10	2	240	5	60	1.9	9.4	6
103	39	female	1.66	57.2	20.76	5	60	0	0	6	120	1.7	4.2	4
104	22	female	1.57	54.2	21.99	7	30	2	30	5	90	1.6	11.1	7.1
105	26	female	1.53	50.6	21.62	6	60	1	60	2	60	1.3	7.3	5.8
106	23	male	1.725	68	22.85	6	60	0	0	5	90	3.5	8.1	5.1
107	25	female	1.55	53.7	22.5	4	20	3	60	2	60	2.1	11.4	9.1
108	24	male	1.79	77	24.03	6	30	4	240	4	90	1.6	9.3	7.1
109	26	male	1.91	83	22.75	7	20	2	240	5	60	1	12.2	8.2
110	20	female	1.67	62.4	22.37	7	120	0	0	5	60	2.3	8.6	7.4
111	28	male	1.7	98.2	33.98	7	90	2	90	2	60	1.7	10.6	7.8
112	25	female	1.59	55	21.76	7	30	0	0	2	120	3.1	12.8	10.9
113	21	male	1.78	73	23.04	7	30	0	0	2	120	1.6	9.9	7.6
114	21	male	1.73	73.4	24.5	0	0	0	0	3	150	1.7	7.8	4.8
115	22	female	1.67	63.8	22.88	0	0	1	120	2	180	2.6	13.4	9.1
116	30	female	1.74	67.35	22.25	0	0	6	60	6	120	2.7	11.5	8.9
117	29	male	1.79	91.5	28.56	7	90	7	15	1	75	1.9	16.8	15.7
118	26	female	1.64	61.75	22.96	0	0	0	0	2	60	3.6	13	12.5
119	20	female	1.67	64	22.95	0	0	0	0	4	120	2.1	8.7	7.2
120	25	male	1.76	66.7	21.53	6	10	2	240	3	60	2.3	7.2	4.1
121	30	male	1.75	75	24.49	5	60	4	30	4	60	1.5	13.5	11.9
122	25	male	1.78	78	24.62	0	0	4	60	5	105	2.5	10.4	7.6
123	18	female	1.63	75.35	28.36	7	60	6	120	5	120	2.1	12	7.3
124	27	male	1.72	66.4	22.44	7	60	2	30	5	90	1.2	9.6	7.9
126	25	female	1.55	49.3	20.65	7	20	4	60	4	90	3.4	7.7	4.8
127	21	male	1.71	63.2	21.61	5	20	7	45	5	150	3.2	6.3	3.9
128	21	female	1.69	53.4	18.7	6	30	2	60	5	120	1.9	6.2	2.8
129	26	female	1.67	62.5	22.55	7	60	3	60	1	10	1.8	5.7	3.2
130	19	female	1.6	55.1	21.66	7	130	2	35	2	35	3.6	10.4	9.7

## Sheet: 50% S2
code	descriptive					IPAQ						Lactate (mg/dl)
participant	age	gender	heigth	weight	BMI	low (days)	low (minutes)	moderate (days)	moderate (minutes)	vigorous (days)	vigorous (minutes)	PRE	INM POST	POST
101	34	male	1.91	91	24.94	0	0	7	20	5	90	3	10.1	7.5
102	25	female	1.74	83.5	27.58	4	10	2	240	5	60	1.8	8.5	5.5
103	39	female	1.66	57.2	20.76	5	60	0	0	6	120	1.5	5.8	3.4
104	22	female	1.57	54.2	21.99	7	30	2	30	5	90	1.8	9.4	4.7
105	26	female	1.53	50.6	21.62	6	60	1	60	2	60	2.4	10.2	7.3
106	23	male	1.725	68	22.85	6	60	0	0	5	90	1.3	9.1	7.6
107	25	female	1.55	53.7	22.5	4	20	3	60	2	60	1.2	12.8	11
108	24	male	1.79	77	24.03	6	30	4	240	4	90	2.5	7.7	5.6
109	26	male	1.91	83	22.75	7	20	2	240	5	60	2.1	12.7	11.7
110	20	female	1.67	62.4	22.37	7	120	0	0	5	60	1.4	10.9	9.9
111	28	male	1.7	98.2	33.98	7	90	2	90	2	60	2.1	13.3	9.8
112	25	female	1.59	55	21.76	7	30	0	0	2	120	2.5	15.3	11.3
113	21	male	1.78	73	23.04	7	30	0	0	2	120	1.2	6.5	4.5
114	21	male	1.73	73.4	2022-05-24	0	0	0	0	3	150	2.5	8.8	5.9
115	22	female	1.67	63.8	22.88	0	0	1	120	2	180	2.5	17.2	13.1
116	30	female	1.74	67.35	22.25	0	0	6	60	6	120	3.3	7.8	6.3
117	29	male	1.79	91.5	28.56	7	90	7	15	1	75	1.7	12.4	9
118	26	female	1.64	61.75	22.96	0	0	0	0	2	60	1.4	11.1	10.6
119	20	female	1.67	64	22.95	0	0	0	0	4	120	3.3	11	8.7
120	25	male	1.76	66.7	21.53	6	10	2	240	3	60	2.7	6.5	4.5
121	30	male	1.75	75	24.49	5	60	4	30	4	60	2.3	13.6	10.4
122	25	male	1.78	78	24.62	0	0	4	60	5	105	2.3	13	6.1
123	18	female	1.63	75.35	28.36	7	60	6	120	5	120	1.3	10.4	6.4
124	27	male	1.72	66.4	22.44	7	60	2	30	5	90	2.2	8.2	8.4
126	25	female	1.55	49.3	20.65	7	20	4	60	4	90	2.9	8.8	6.2
127	21	male	1.71	63.2	21.61	5	20	7	45	5	150	3.3	7.7	5.6
128	21	female	1.69	53.4	18.7	6	30	2	60	5	120	1.1	5.2	2.8
129	26	female	1.67	62.5	22.55	7	60	3	60	1	10	1.1	6.7	5.5
130	19	female	1.6	55.1	21.66	7	130	2	35	2	35	1.6	8.8	6.4

## Sheet: 75% S1
code	descriptive					IPAQ						Lactate (mg/dl)
participant	age	gender	heigth	weight	BMI	low (days)	low (minutes)	moderate (days)	moderate (minutes)	vigorous (days)	vigorous (minutes)	PRE	INM POST	POST
101	34	male	1.91	91	24.94	0	0	7	20	5	90	1.5	5.5	4.1
102	25	female	1.74	83.5	27.58	4	10	2	240	5	60	2.2	5.5	3.1
103	39	female	1.66	57.2	20.76	5	60	0	0	6	120	1.3	4.1	2.6
104	22	female	1.57	54.2	21.99	7	30	2	30	5	90	1.1	4.6	4.4
105	26	female	1.53	50.6	21.62	6	60	1	60	2	60	1.8	3.3	2.5
106	23	male	1.725	68	22.85	6	60	0	0	5	90	1.9	4.8	2.3
107	25	female	1.55	53.7	22.5	4	20	3	60	2	60	0.9	6.2	3.3
108	24	male	1.79	77	24.03	6	30	4	240	4	90	3.8	7	5.2
109	26	male	1.91	83	22.75	7	20	2	240	5	60	2	7.5	4.2
110	20	female	1.67	62.4	22.37	7	120	0	0	5	60	2.9	6.9	4.8
111	28	male	1.7	98.2	33.98	7	90	2	90	2	60	2.2	3.7	3
112	25	female	1.59	55	21.76	7	30	0	0	2	120	2.9	8.7	6.2
113	21	male	1.78	73	23.04	7	30	0	0	2	120	1.9	8.4	3.1
114	21	male	1.73	73.4	2022-05-24	0	0	0	0	3	150	1.5	11.9	6.1
115	22	female	1.67	63.8	22.88	0	0	1	120	2	180	2.7	9.1	6.2
116	30	female	1.74	67.35	22.25	0	0	6	60	6	120	2.5	6.1	4.7
117	29	male	1.79	91.5	28.56	7	90	7	15	1	75	2.1	10.6	7.2
118	26	female	1.64	61.75	22.96	0	0	0	0	2	60	2.9	6	4.1
119	20	female	1.67	64	22.95	0	0	0	0	4	120	3	6	3
120	25	male	1.76	66.7	21.53	6	10	2	240	3	60	2.1	11.8	2.5
121	30	male	1.75	75	24.49	5	60	4	30	4	60	3.2	11.6	6.9
122	25	male	1.78	78	24.62	0	0	4	60	5	105	1.5	5	3.6
123	18	female	1.63	75.35	28.36	7	60	6	120	5	120	1	11.8	4.3
124	27	male	1.72	66.4	22.44	7	60	2	30	5	90	2.7	5.8	3.6
126	25	female	1.55	49.3	20.65	7	20	4	60	4	90	2.8	3.5	2.7
127	21	male	1.71	63.2	21.61	5	20	7	45	5	150	2.6	5.6	4
128	21	female	1.69	53.4	18.7	6	30	2	60	5	120	2.6	4.3	2.8
129	26	female	1.67	62.5	22.55	7	60	3	60	1	10	1.7	5.2	3.6
130	19	female	1.6	55.1	21.66	7	130	2	35	2	35	0.8	8.1	5.4

## Sheet: 75% S2
code	descriptive					IPAQ						Lactate (mg/dl)
participant	age	gender	height	weight	BMI	low (days)	low (minutes)	moderate (days)	moderate (minutes)	vigorous (days)	vigorous (minutes)	PRE	INM POST	POST
101	34	male	1.91	91	24.94	0	0	7	20	5	90	1.9	6.5	4.4
102	25	female	1.74	83.5	27.58	4	10	2	240	5	60	2.8	6.5	5.8
103	39	female	1.66	57.2	20.76	5	60	0	0	6	120	1.4	8.2	2.4
104	22	female	1.57	54.2	21.99	7	30	2	30	5	90	2.3	5.8	3.7
105	26	female	1.53	50.6	21.62	6	60	1	60	2	60	1.2	4.1	3.5
106	23	male	1.725	68	22.85	6	60	0	0	5	90	2.2	6.9	3.9
107	25	female	1.55	53.7	22.5	4	20	3	60	2	60	2.1	8	4.2
108	24	male	1.79	77	24.03	6	30	4	240	4	90	2.3	8.1	4.5
109	26	male	1.91	83	22.75	7	20	2	240	5	60	2.3	7.3	3.8
110	20	female	1.67	62.4	22.37	7	120	0	0	5	60	2.8	5.2	4.5
111	28	male	1.7	98.2	33.98	7	90	2	90	2	60	1.3	4.4	4.1
112	25	female	1.59	55	21.76	7	30	0	0	2	120	2.9	5.8	3.9
113	21	male	1.78	73	23.04	7	30	0	0	2	120	2.7	6.1	4.1
114	21	male	1.73	73.4	2022-05-24	0	0	0	0	3	150	1.3	4.6	2.1
115	22	female	1.67	63.8	22.88	0	0	1	120	2	180	2.6	6.3	7
116	30	female	1.74	67.35	22.25	0	0	6	60	6	120	2	4.2	3.4
117	29	male	1.79	91.5	28.56	7	90	7	15	1	75	1.7	13	7.1
118	26	female	1.64	61.75	22.96	0	0	0	0	2	60	1.9	6.9	3.7
119	20	female	1.67	64	22.95	0	0	0	0	4	120	2.3	4.6	2.9
120	25	male	1.76	66.7	21.53	6	10	2	240	3	60	0.9	2.8	2.1
121	30	male	1.75	75	24.49	5	60	4	30	4	60	3.2	8	6.6
122	25	male	1.78	78	24.62	0	0	4	60	5	105	2	7	4.2
123	18	female	1.63	75.35	28.36	7	60	6	120	5	120	1.9	6.5	3.9
124	27	male	1.72	66.4	22.44	7	60	2	30	5	90	1.5	6.6	5.5
126	25	female	1.55	49.3	20.65	7	20	4	60	4	90	3.7	5.8	4.1
127	21	male	1.71	63.2	21.61	5	20	7	45	5	150	2.5	3.6	3
128	21	female	1.69	53.4	18.7	6	30	2	60	5	120	3.4	6.6	3.4
129	26	female	1.67	62.5	22.55	7	60	3	60	1	10	1.2	4.1	2.6
130	19	female	1.6	55.1	21.66	7	130	2	35	2	35	1.4	5.8	3.8
